# Supplementary material for: Syntheses, structures and photoluminescence of five zinc(ii) coordination polymers based on 5-methoxyisophthalate and flexible N-donor ancillary ligands
Source: Royal Society of Chemistry journal article supplement (doi:10.1039/c2ce06581a), 2012-01-01
Supplement: c2ce06581a.pdf [file c2ce06581a.pdf]

**Syntheses, Structures, and Photoluminescence of Zinc(II)  
Coordination Polymers Based on 5-methoxyisophthalate and  
Flexible N-donor ancillary Ligands**

Jian-Hua Qin, Lu-Fang Ma\*, Yue Hu and Li-Ya Wang\*

*College of Chemistry and Chemical Engineering, Luoyang Normal University, Luoyang 471022, P. R. China.*

*To whom correspondence should be addressed. E-mail: mazhuxp@126.com; wlya@lynu.edu.cn*

**Table S1. Selected bond lengths (Å) and angles (°) for 1**

|                     |            |                   |             |
|---------------------|------------|-------------------|-------------|
| Zn(1)-O(3)#1        | 1.9629(14) | Zn(1)-O(1)        | 1.9903(15)□ |
| Zn(1)-N(1)          | 1.9949(17) | Zn(1)-O(4)#2      | 2.0419(14)  |
| O(3)#1-Zn(1)-N(1)   | 125.80(7)  | O(1)-Zn(1)-N(1)   | 119.29(7)   |
| O(3)#1-Zn(1)-O(4)#2 | 104.65(6)  | O(1)-Zn(1)-O(4)#2 | 96.93(6)    |
| N(1)-Zn(1)-O(4)#2   | 97.70(7)   | O(3)#1-Zn(1)-O(2) | 90.16(6)    |
| O(1)-Zn(1)-O(2)     | 58.01(5)   | N(1)-Zn(1)-O(2)   | 90.30(6)    |

Symmetry transformations used to generate equivalent atoms: #1  $-x + 1, -y + 1, -z + 1$ ; #2  $x, y, z + 1$ .

**Table S2. Selected bond lengths (Å) and angles (°) for 2**

|                   |            |                 |            |
|-------------------|------------|-----------------|------------|
| Zn(1)-O(1)        | 1.995(3)□  | Zn(1)-O(4)#1    | 1.996(2)   |
| Zn(1)-N(1)        | 2.020(3)   | Zn(1)-N(3)      | 2.030(3)   |
| O(1)-Zn(1)-O(4)#1 | 96.88(11)  | O(1)-Zn(1)-N(1) | 116.33(12) |
| O(4)#1-Zn(1)-N(1) | 108.07(12) | O(1)-Zn(1)-N(3) | 97.91(12)  |
| O(4)#1-Zn(1)-N(3) | 113.70(12) | N(1)-Zn(1)-N(3) | 121.20(12) |

Symmetry transformations used to generate equivalent atoms: #1  $x - 1, y, z$ .

**Table S3. Selected bond lengths (Å) and angles (°) for 3**

|                   |           |                     |           |
|-------------------|-----------|---------------------|-----------|
| Zn(1)-O(7)        | 1.989(7)  | Zn(1)-N(4)          | 2.001(9)  |
| Zn(1)-N(8)#1      | 1.998(8)  | Zn(1)-O(9)#2        | 2.007(7)  |
| Zn(2)-O(2)        | 1.970(6)  | Zn(2)-N(1)          | 1.979(8)  |
| Zn(2)-O(4)#3      | 1.988(7)  | Zn(2)-N(5)          | 1.993(8)  |
| O(7)-Zn(1)-N(4)   | 103.9(3)  | O(7)-Zn(1)-N(8)#1   | 112.1(3)  |
| N(4)-Zn(1)-N(8)#1 | 115.3(3)  | O(7)-Zn(1)-O(9)#2   | 100.1(3)  |
| N(4)-Zn(1)-O(9)#2 | 109.5(3)  | N(8)#1-Zn(1)-O(9)#2 | 114.4(3)  |
| O(2)-Zn(2)-N(1)   | 112.3(3)  | O(2)-Zn(2)-O(4)#3   | 103.1(3)□ |
| N(1)-Zn(2)-O(4)#3 | 110.8(3)□ | O(2)-Zn(2)-N(5)     | 102.4(3)  |
| N(1)-Zn(2)-N(5)   | 118.1(3)  | O(4)#3-Zn(2)-N(5)   | 108.8(3)  |

Symmetry transformations used to generate equivalent atoms: #1  $x, y, z + 1$ ; #2  $x + 1, y, z$ ; #3  $x - 1, y, z$ .

**Table S4. Selected bond lengths (Å) and angles (°) for 4**

|                     |            |                   |            |
|---------------------|------------|-------------------|------------|
| Zn(1)-O(2)          | 1.929(5)   | Zn(1)-O(4)#1      | 1.939(5)   |
| Zn(1)-N(1)          | 2.010(5)□  | Zn(1)-N(3)#2      | 2.017(5)   |
| O(2)-Zn(1)-O(4)#1   | 118.33(17) | O(2)-Zn(1)-N(1)   | 118.4(2)   |
| O(4)#1-Zn(1)-N(1)   | 98.3(2)    | O(2)-Zn(1)-N(3)#2 | 100.7(2)   |
| O(4)#1-Zn(1)-N(3)#2 | 117.3(2)   | N(1)-Zn(1)-N(3)#2 | 103.73(14) |

Symmetry transformations used to generate equivalent atoms: #1  $-x + 1, -y + 1, z + 1/2$ ; #2  $-x - 1/2, y + 1/2, z + 1/2$ .

**Table S5. Selected bond lengths (Å) and angles (°) for 5**

|                     |            |                   |            |
|---------------------|------------|-------------------|------------|
| Zn(1)-O(1)          | 1.9116(15) | Zn(1)-O(4)#1      | 1.9483(15) |
| Zn(1)-N(1)          | 1.9782(18) | Zn(1)-O(3)#2      | 1.9911(16) |
| O(1)-Zn(1)-O(4)#1   | 111.60(7)  | O(1)-Zn(1)-N(1)   | 120.77(8)  |
| O(4)#1-Zn(1)-N(1)   | 104.29(7)  | O(1)-Zn(1)-O(3)#2 | 94.92(7)   |
| O(4)#1-Zn(1)-O(3)#2 | 114.62(7)  | N(1)-Zn(1)-O(3)#2 | 111.02(7)  |

Symmetry transformations used to generate equivalent atoms: #1  $x, -y + 1, z - 1/2$ ; #2  $-x, -y + 1, -z + 1$ .

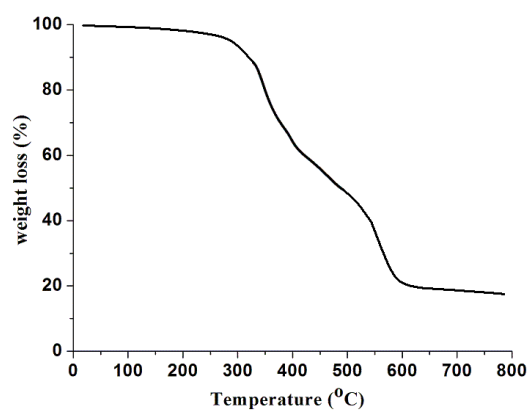

(a)

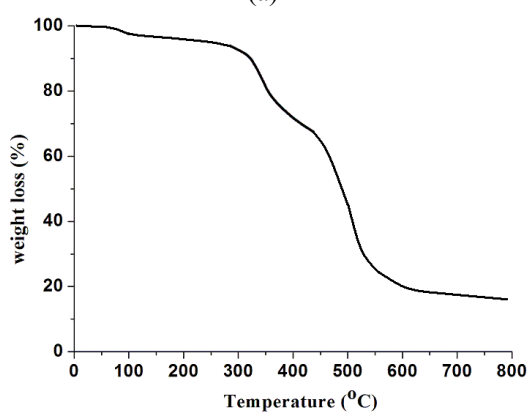

(b)

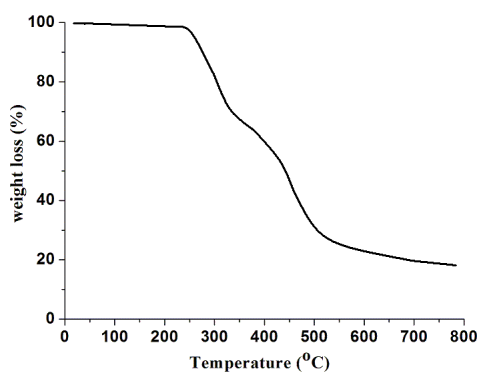

(c)

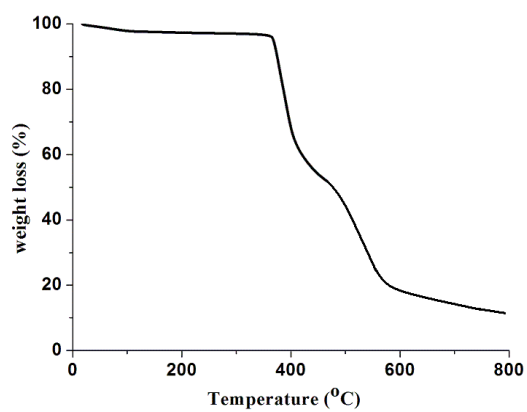

(d)

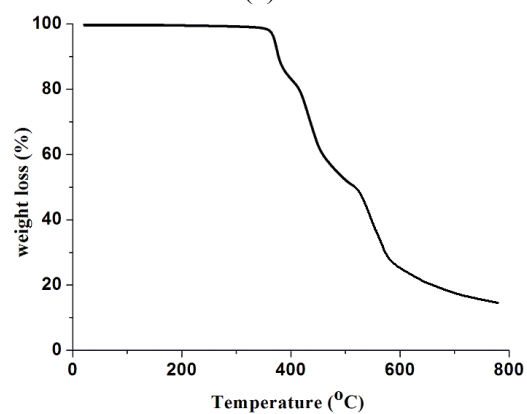

(e)

**Figure S1.** Thermogravimetric analysis (TGA) plots of (a) 1, (b) 2, (c) 3, (d) 4, and (e) 5.
